## CORRECTION

# Correction: Cognitive-behavioural pathways from pain to poor sleep quality and emotional distress in the general population: The indirect effect of sleep-related anxiety and sleep hygiene

The *PLOS ONE* Staff

## Notice of Republication

This article was republished on January 25, 2022, to remove a Supporting Information file that was incorrectly included in the originally published article. The publisher apologizes for the error. Please download this article again to view the correct version.

## Reference

1. Rakhimov A, Whibley D, Tang NKY (2022) Cognitive-behavioural pathways from pain to poor sleep quality and emotional distress in the general population: The indirect effect of sleep-related anxiety and sleep hygiene. *PLoS ONE* 17(1): e0260614. <https://doi.org/10.1371/journal.pone.0260614> PMID: 35061683

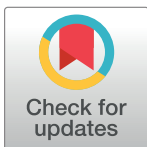

## OPEN ACCESS

**Citation:** The *PLOS ONE* Staff (2022) Correction: Cognitive-behavioural pathways from pain to poor sleep quality and emotional distress in the general population: The indirect effect of sleep-related anxiety and sleep hygiene. *PLoS ONE* 17(2): e0263758. <https://doi.org/10.1371/journal.pone.0263758>

**Published:** February 3, 2022

**Copyright:** © 2022 The PLOS ONE Staff. This is an open access article distributed under the terms of the [Creative Commons Attribution License](https://creativecommons.org/licenses/by/4.0/), which permits unrestricted use, distribution, and reproduction in any medium, provided the original author and source are credited.
